1 Drug repurposing: omeprazole increases the efficacy of acyclovir  
2 against herpes simplex virus type 1 and 2

3 Martin Michaelis<sup>1</sup>, Malte Christian Kleinschmidt<sup>2</sup>, Mark N. Wass<sup>1</sup>, Jindrich Cinatl jr.<sup>2\*</sup>

4

5 <sup>1</sup>Industrial Biotechnology Centre and School of Biosciences, University of Kent,  
6 Canterbury CT2 7NJ, UK

7 <sup>2</sup>Institut für Medizinische Virologie, Klinikum der Goethe-Universität, Paul-Ehrlich-Str.  
8 40, 60596 Frankfurt am Main, Germany

9

10 **Key words:** antiviral therapy, herpes simplex virus type 1, herpes simplex virus type 2

11

12 \*Corresponding author:

13 Jindrich Cinatl

14 Institut für Medizinische Virologie, Paul-Ehrlich-Str. 40, 60596 Frankfurt am Main,  
15 Germany

16 E-mail: [Cinatl@em.uni-frankfurt.de](mailto:Cinatl@em.uni-frankfurt.de)

17 Tel.: +49 69 6301-6409, FAX +49 69 6301-4302

18

## 19 Abstract

20 **Objectives:** Omeprazole was shown to improve the anti-cancer effect of the  
21 nucleoside-analogue 5-fluorouracil. Here, we investigated the effects of omeprazole  
22 on the activities of the antiviral nucleoside analogues ribavirin and acyclovir.

23 **Methods:** West Nile virus-infected Vero cells and influenza A H1N1-infected MDCK  
24 cells were treated with omeprazole and/ or ribavirin. Herpes simplex virus 1 (HSV-1)-  
25 or HSV-2-infected Vero or HaCat cells were treated with omeprazole and/ or acyclovir.  
26 Antiviral effects were determined by examination of cytopathogenic effects (CPE),  
27 immune staining, and virus yield assay. Cell viability was investigated by MTT assay.

28 **Results:** Omeprazole concentrations up to 80µg/mL did not affect the antiviral effects  
29 of ribavirin. In contrast, omeprazole increased the acyclovir-mediated effects on HSV-  
30 1- and HSV-2-induced CPE formation in a dose-dependent manner in Vero and HaCat  
31 cells. Addition of omeprazole 80µg/mL resulted in a 10.8-fold reduction of the acyclovir  
32 concentration that reduces CPE formation by 50% (IC<sub>50</sub>) in HSV-1-infected Vero cells  
33 and in a 47.7-fold acyclovir IC<sub>50</sub> reduction in HSV-1-infected HaCat cells. In HSV-2-  
34 infected cells, omeprazole reduced the acyclovir IC<sub>50</sub> by 7.3-fold (Vero cells) or by 12.9-  
35 fold (HaCat cells). Omeprazole also enhanced the acyclovir-mediated effects on viral  
36 antigen expression and virus replication in HSV-1- and HSV-2-infected cells. In HSV-  
37 1-infected HaCat cells, omeprazole 80µg/mL reduced the virus titre in the presence of  
38 acyclovir 1µg/mL by 1.6x10<sup>5</sup>-fold. In HSV-2-infected HaCat cells omeprazole 80µg/mL  
39 reduced the virus titre in the presence of acyclovir 2µg/mL by 9.2x10<sup>3</sup>-fold. The  
40 investigated drug concentrations did not affect cell viability, neither alone nor in  
41 combination.

42 **Conclusions:** Omeprazole increases the anti-HSV activity of acyclovir. As clinically  
43 well-established and tolerated drug, it is a candidate drug for antiviral therapies in  
44 combination with acyclovir.

45

## 46 Introduction

47 Omeprazole and other proton pump inhibitors were found to increase the activity of  
48 anti-cancer drugs including the nucleoside analogue 5-fluorouracil (Luciani et al., 2004;  
49 Ikemura et al., 2017). Proton pump inhibitors are the most frequently prescribed drugs  
50 for the treatment and prophylaxis of gastroesophageal reflux as well as of gastric and  
51 duodenal ulcers that are associated with hyper-acidic states. Since they are known to  
52 be well-tolerated, they were suggested as repositioning candidates for the use as part  
53 of anti-cancer therapies (Ikemura et al., 2017).

54 Here, we investigated the effects of omeprazole on the efficacy of the antiviral  
55 nucleoside analogues acyclovir and ribavirin. We found that omeprazole enhanced the  
56 antiviral effects of acyclovir against herpes simplex virus type 1 (HSV-1) and HSV-2  
57 but did not influence the activity of ribavirin against West-Nile viruses or influenza  
58 viruses.

59

## 60 Materials and methods

### 61 Cell culture

62 Vero and MDCK cells were obtained from the American Type Culture Collection  
63 (ATCC, Rockville, MD) and cultured at 37° C in minimum essential medium (MEM)  
64 supplemented with 10% foetal bovine serum. HaCaT cells were purchased from CLS  
65 Cell Line Services GmbH (Eppelheim, Germany) and cultivated in Iscove's modified  
66 Dulbecco's medium (IMDM) supplemented with 10% foetal bovine serum.

67

### 68 Viruses

69 HSV-1 strain McIntyre and HSV-2 strain MS were both obtained from ATCC. West Nile  
70 virus (WNV) strain NY385-99 was kindly provided by Dr J ter Meulen (Institut für  
71 Virologie, Phillips-Universität, Marburg, Germany). Virus stocks were prepared in Vero  
72 cells grown in MEM with 4% foetal bovine serum. The influenza virus strain Influenza  
73 A/New Caledonia/20/99 (H1N1) was received from the WHO Influenza Centre  
74 (National Institute for Medical Research, London, UK). Virus stocks were prepared in  
75 MDCK cells grown in 4% foetal bovine serum. Infectious virus titres were determined  
76 by titration on MDCK cell monolayer in 96-well plates as 50% tissue culture infectious  
77 dose (TCID<sub>50</sub>) by the method of Spearman and Kärber (Spearman, 1908; Kärber,  
78 1931).

79

### 80 Drugs

81 Acyclovir was received from GlaxoSmithKline (Munich, Germany), omeprazole from  
82 AstraZeneca (Wedel, Germany), and ribavirin from Valeant Pharmaceuticals Germany  
83 GmbH (Eschborn, Germany).

84

## 85 **Cytopathogenic effect (CPE) reduction assay**

86 For the investigation of HSV-1- and HSV-2-induced cytopathogenic effects (CPEs),  
87 confluent Vero or HaCaT cell monolayer in 96-well microtiter plates were inoculated  
88 with HSV-1 or HSV-2 at MOI 1 or 0.1, respectively. Following a 1h incubation period,  
89 the inoculum was removed and the drugs, either alone or in combination, were added.  
90 The virus-induced CPE was recorded microscopically after 48h post infection.

91 For the investigation of WNV-induced CPEs, Vero cell monolayers were infected with  
92 MOI 0.1. Following a 1h virus incubation period, the medium was removed and infected  
93 cells were incubated in medium containing different concentrations of drugs at the  
94 respective concentration. The CPE was recorded at 48h post infection.

95 Confluent MDCK cell monolayers were infected with Influenza H1N1 (MOI 0.01).  
96 Following a 1h virus incubation period, the medium was removed and infected cells  
97 were incubated in medium containing different concentrations of drugs at the  
98 respective concentration. The CPE was recorded at 24h post infection.

99 CPEs were scored by two independent examiners and expressed in % of the untreated  
100 virus control that was defined to be 100%.

101

## 102 **Immunostaining**

103 Intracellular HSV protein was evaluated by immunostaining. Cells were fixed with  
104 60/40 ice cold methanol/acetone for 15 min. Staining was performed using a rabbit  
105 polyclonal antibody directed against HSV-1 (ab9533) and a sheep polyclonal antibody  
106 directed against HSV-2 (ab21112) in combination with biotin-conjugated secondary  
107 goat anti-rabbit (ab6720) and rabbit anti-sheep (ab6746) antibodies (all antibodies  
108 derived from Abcam, Cambridge, UK). Protein was visualised using streptavidin-  
109 peroxidase complex with AEC as a substrate.

110

111 **Viability assay**

112 The cellular viability was assessed on confluent cell layers with the 3-(4,5-dimethyl-2-  
113 thiazolyl)-2,5-diphenyl-2H-tetrazolium bromide (MTT) assay method as described  
114 previously (Michaelis et al., 2007). The viability was expressed as percentage of non-  
115 treated control.

116

## 117 Results

### 118 **Effects of omeprazole in combination with ribavirin on cytopathogenic effect** 119 **(CPE) formation in WNV- or influenza A H1N1-infected cells**

120 Omeprazole 80µg/mL did not affect the effects of ribavirin on CPE formation in WNV-  
121 infected Vero cells or H1N1-infected MDCK cells (Figure 1A, Suppl. Table 1).

122

### 123 **Effects of omeprazole in combination with acyclovir on HSV-1 and HSV-2** 124 **replication**

125 In the presence of omeprazole 80µg/mL, acyclovir concentrations that reduced CPE  
126 formation by 50% (IC<sub>50</sub>) were reduced by 11-fold in HSV-1-infected Vero cells and by  
127 7-fold in HSV-2-infected Vero cells. In addition, omeprazole 80µg/mL reduced the  
128 acyclovir IC<sub>50</sub>s by 48-fold in HSV-1-infected HaCat cells and by 13-fold in HSV-2-  
129 infected HaCat cells (Figure 1A, Suppl. Table 1). Immune staining also indicated  
130 reduced numbers of virus-infected cells after treatment with a combination of  
131 omeprazole and acyclovir compared to either single treatment (Figure 1B). Further  
132 experiments indicated that omeprazole reduced acyclovir IC<sub>50</sub>s in HSV-1- and HSV-2-  
133 infected HaCat cells in a dose-dependent fashion (Figure 1C, Suppl. Table 2).

134 The detection of virus titres revealed moderate effects of omeprazole on virus  
135 replication. Again, omeprazole strongly increased the anti-HSV-1 and anti-HSV-2  
136 effects of acyclovir (Figure 2, Suppl. Table 3). The investigated omeprazole and  
137 acyclovir concentrations did not affect cell viability, neither alone nor in combination.

138



## 139 Discussion

140 Based on previous investigations that showed that omeprazole increases the anti-  
141 cancer activity of the nucleoside analogue 5-fluorouracil (Luciani et al., 2004), we here  
142 investigated the effects of omeprazole on the antiviral effects of ribavirin and acyclovir.  
143 Ribavirin is a broad spectrum antiviral drug (Beaucourt & Vignuzzi, 2014). However,  
144 omeprazole did neither modify ribavirin-mediated effects in H1N1 influenza A virus-  
145 infected cell cultures nor in West Nile virus-infected cell cultures.

146 Acyclovir is a first line drug for HSV-1, HSV-2, and varicella zoster virus infection (Piret  
147 & Boivin, 2016; Klysik et al., 2018). In contrast to the lack of effect of omeprazole on  
148 ribavirin-mediated antiviral effects, omeprazole interfered with HSV-1 and HSV-2  
149 replication in a dose-dependent fashion. Omeprazole increased the anti-HSV activity  
150 of acyclovir in Vero cells and in the human keratinocyte cell line HaCat. Since  
151 omeprazole and acyclovir were both added simultaneously to virus-infected cell  
152 cultures after a 1h viral adsorption period, omeprazole increases the effects of  
153 acyclovir during the viral replication cycle.

154 The mechanism by which omeprazole enhances the activity of acyclovir seems to differ  
155 from the mechanism by which the compound increases 5-fluorouracil efficacy.  
156 Omeprazole pre-treatment was necessary to increase 5-fluorouracil activity (Luciani et  
157 al., 2004). In contrast, the combination of omeprazole and acyclovir exerted its  
158 combined activity when added at the same time.

159 There is a need for improved therapies for HSV-1- and HSV-2-associated disease.  
160 After primary infection, HSV-1 and HSV-2 establish life-long persistence which may  
161 result in recurrent disease which typically manifests as herpes labialis or herpes  
162 genitalis and which may be associated with significant morbidity (Gnann & Whitley,  
163 2016; Heslop et al., 2016; Klysik et al., 2018). Even in the case of herpes labialis, which

164 is not commonly associated with complications, treatment success is not always  
165 satisfactory as indicated by the introduction of topical acyclovir/ hydrocortisone  
166 combinations (Nguyen et al., 2014). In immunodeficient individuals, HSV-1/-2 infection  
167 is often associated with more severe disease, and resistance formation to acyclovir is  
168 a severe problem (Piret & Boivin, 2016; Karrasch et al., 2018). Moreover, ocular HSV  
169 infection is a major cause of blindness in industrialised countries (Klysik et al., 2018).  
170 In conclusion, omeprazole substantially enhances the antiviral effects of acyclovir in  
171 HSV-1- and HSV-2-infected cells. Improved therapies for HSV-1/2 infection are highly  
172 desirable, in particular for immunocompromised individuals. Since omeprazole is a  
173 clinically well-established drug with a preferable safety profile, it is an excellent  
174 candidate for drug repositioning strategies (Ikemura et al., 2017).

175

## 176 Reference List

- 177 Beaucourt S, Vignuzzi M. Ribavirin: a drug active against many viruses with multiple  
178 effects on virus replication and propagation. Molecular basis of ribavirin resistance.  
179 Curr Opin Virol. 2014 Oct;8:10-5.
- 180 Gnann JW Jr, Whitley RJ. CLINICAL PRACTICE. Genital Herpes. N Engl J Med. 2016  
181 Aug 18;375(7):666-74.
- 182 Heslop R, Roberts H, Flower D, Jordan V. Interventions for men and women with their  
183 first episode of genital herpes. Cochrane Database Syst Rev. 2016 Aug  
184 30;(8):CD010684.
- 185 Ikemura K, Hiramatsu S, Okuda M. Drug Repositioning of Proton Pump Inhibitors for  
186 Enhanced Efficacy and Safety of Cancer Chemotherapy. Front Pharmacol. 2017 Dec  
187 12;8:911.
- 188 Kärber G. Beitrag zur kollektiven Behandlung pharmakologischer Reihenversuche [A  
189 contribution to the collective treatment of a pharmacological experimental series].  
190 Archiv für experimentelle Pathologie und Pharmakologie 1931;162:480-3.
- 191 Karrasch M, Liermann K, Betz BB, Wagner S, Scholl S, Dahms C, Sauerbrei A, Kunze  
192 A. Rapid acquisition of acyclovir resistance in an immunodeficient patient with herpes  
193 simplex encephalitis. J Neurol Sci. 2018 Jan 15;384:89-90.
- 194 Klysik K, Pietraszek A, Karewicz A, Nowakowska M. Acyclovir in the Treatment of  
195 Herpes Viruses - a Review. Curr Med Chem. 2018 Mar 8. doi:  
196 10.2174/0929867325666180309105519.
- 197 Luciani F, Spada M, De Milito A, Molinari A, Rivoltini L, Montinaro A, Marra M, Lugini  
198 L, Logozzi M, Lozupone F, Federici C, Iessi E, Parmiani G, Arancia G, Belardelli F,  
199 Fais S. Effect of proton pump inhibitor pretreatment on resistance of solid tumors to  
200 cytotoxic drugs. J Natl Cancer Inst. 2004 Nov 17;96(22):1702-13.

201 Michaelis M, Kleinschmidt MC, Doerr HW, Cinatl J Jr. Minocycline inhibits West Nile  
202 virus replication and apoptosis in human neuronal cells. J Antimicrob Chemother  
203 2007;60:981-6.

204 Nguyen HP, Stiegel KR, Downing C, Stiegel KR. Recent approval of Xerese in  
205 Canada: 5% acyclovir and 1% hydrocortisone topical cream in the treatment of  
206 herpes labialis. Skin Therapy Lett. 2014 May-Jun;19(3):5-8.

207 Piret J, Boivin G. Antiviral resistance in herpes simplex virus and varicella-zoster  
208 virus infections: diagnosis and management. Curr Opin Infect Dis. 2016  
209 Dec;29(6):654-662.

210 Spearman C. The method of "right and wrong cases" ("constantstimuli") without  
211 Gauss's formulae. Br J Psychol 1908;2:227-42.

212

213 **Figures**

**Figure 1**

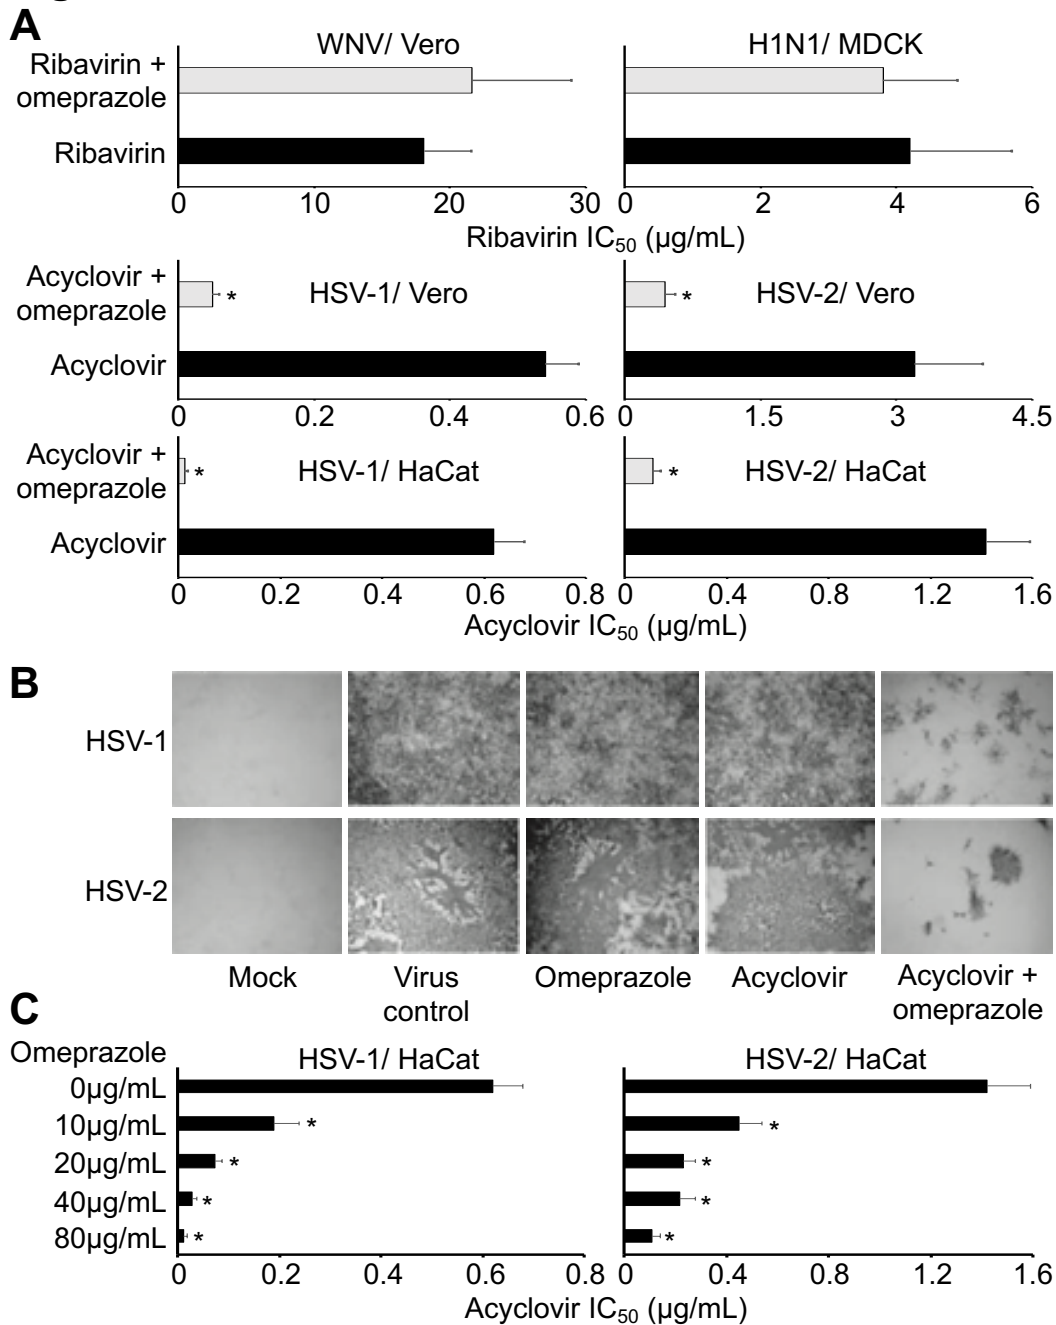

214

215 **Figure 1.** Cytopathogenic effect (CPE) formation and viral gene expression in the  
 216 presence of omeprazole antiviral nucleoside analogues. A) Effects of omeprazole  
 217 (80µg/mL) on the concentrations of antiviral nucleoside analogues that reduce CPE  
 218 formation by 50% (IC<sub>50</sub>) using West Nile virus (WNV)-infected Vero cells, influenza A  
 219 H1N1-infected MDCK cells, and HSV-1- or HSV-2-infected Vero or HaCat cells.

220 Omeprazole alone did not reduce CPE formation. Numerical values are presented in  
221 Suppl. Table 1. B) Effects of omeprazole and acyclovir on the expression of virus  
222 proteins in HSV-1- and HSV-2-infected Vero cells. HSV-1-infected cells were treated  
223 with omeprazole 80µg/mL and/ or acyclovir 0.31µg/mL. HSV-2-infected cells were  
224 treated with omeprazole 40µg/mL and/ or acyclovir 0.6µg/mL. C) Concentration-  
225 dependent effects of omeprazole on the acyclovir IC<sub>50</sub> in HSV-1- or HSV-2-infected  
226 HaCat cells as determined by CPE formation. Numerical values are presented in  
227 Suppl. Table 2. The investigated drug concentrations did not affect cell viability, neither  
228 alone nor in combination. \* P < 0.05 relative to nucleoside analogue alone  
229

## Figure 2

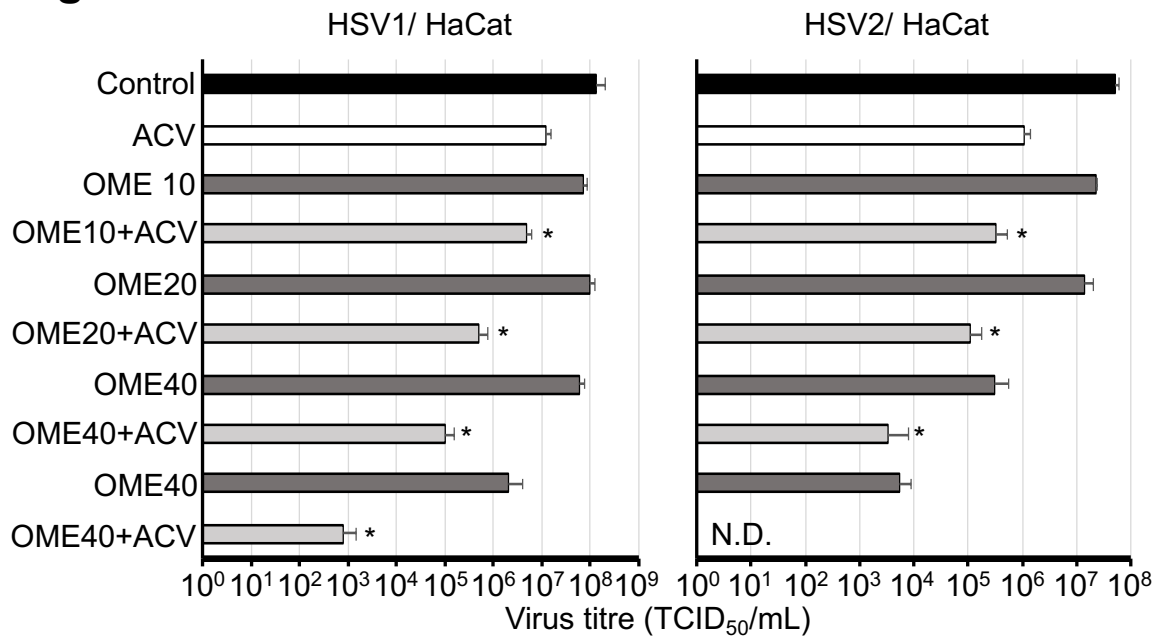

230

231 **Figure 2.** Effect of acyclovir 1µg/mL (HSV-1) or 2µg/mL (HSV-2) alone or in  
232 combination with varying omeprazole (OME) concentrations (µg/mL) on HSV-1 and  
233 HSV-2 titres in HaCat cells. Numerical values are presented in Suppl. Table 3. \* P <  
234 0.05 relative to acyclovir alone; N.D. = no detectable virus titre

235
